# Supplementary material for: Assessment of the Antibiofilm Performance of Chitosan-Based Surfaces in Marine Environments
Source: MDPI journal article supplement (doi:10.3390/ijms232314647), 2022-11-24
Supplement: s1 [file s1]

## Supplementary Materials

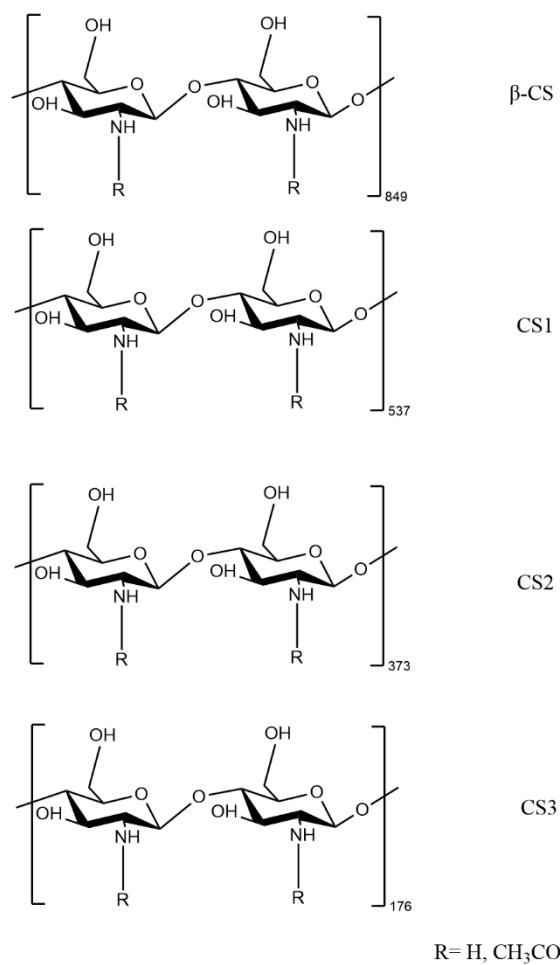

**Figure S1.** Chemical structures of the native chitosan ( $\beta$ -CS) and its three depolymerized derivatives (CS1, CS2, and CS3).
